# Supplementary material for: Measurements of atmospheric ethene by solar absorption FTIR spectrometry
Source: Copernicus journal article supplement (doi:10.5194/acp-2017-403), 2017-06-08
Supplement: Supplementary file 1 [file acp-2017-403-supplement.pdf]

## Supplementary Information

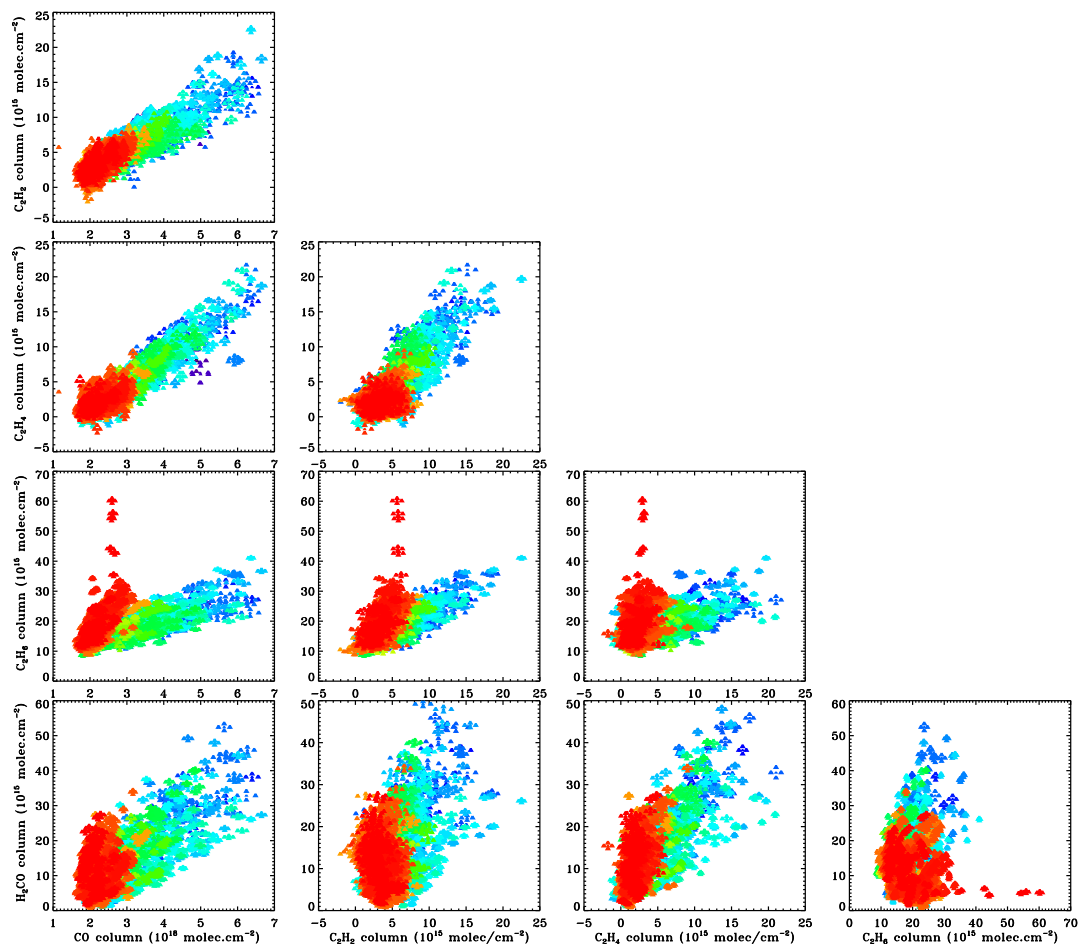

**Figure S1.** Relationships between gas column abundances measured from JPL, color-coded by year (blue = 1990; green = 2000; orange = 2010; red = 2015). Panels on the same row all have the same y-axis, avoiding having to repeat the y-annotation. Panels in the same column have the same x-axis, avoiding repeating the x-annotation.
